# Supplementary material
Source: publisher site journal article supplement (https://www.kjim.org/upload/media/kjim-2020-359-suppl1.pdf)
Supplement: Supplementary file 1 [file kjim-2020-359-suppl1.pdf]

**Supplementary Table 1. Maximum severity and frequency of nausea and retching/vomiting (per protocol set)**

| Variable              | GTS (n = 152) | Ondansetron (n = 166) | p value             |
|-----------------------|---------------|-----------------------|---------------------|
| Severity overall      |               |                       |                     |
| Nausea                |               |                       | 0.8729 <sup>a</sup> |
| None                  | 82 (53.95)    | 83 (50.00)            |                     |
| Mild                  | 48 (31.58)    | 60 (36.14)            |                     |
| Moderate              | 19 (12.50)    | 20 (12.05)            |                     |
| Severe                | 3 (1.97)      | 3 (1.81)              |                     |
| Retching/vomiting     |               |                       | 0.3110 <sup>a</sup> |
| None                  | 135 (88.82)   | 154 (92.77)           |                     |
| Mild                  | 10 (6.58)     | 10 (6.02)             |                     |
| Moderate              | 5 (3.29)      | 1 (0.60)              |                     |
| Severe                | 2 (1.32)      | 1 (0.60)              |                     |
| Life-threatening      | 0             | 0                     |                     |
| Frequency during PEEP |               |                       |                     |
| Nausea                |               |                       |                     |
| Number                | 39            | 38                    |                     |
| Mean ± SD             | 5.18 ± 11.29  | 5.42 ± 4.64           | 0.0049 <sup>b</sup> |
| Median                | 2             | 4                     |                     |
| Retching/Vomiting     |               |                       |                     |
| Number                | 6             | 4                     |                     |
| Mean ± SD             | 5.67 ± 4.76   | 1.25 ± 0.50           | 0.1649 <sup>b</sup> |
| Median                | 6             | 1                     |                     |

Values are presented as number (%). Scored by maximum severity for days 1 to 5.

GTS, granisetron transdermal system; PEEP, primary endpoint evaluation period; SD, standard deviation.

<sup>a</sup>Fisher's exact test.

<sup>b</sup>Wilcoxon's rank sum test.
